# Supplementary material
Source: publisher figshare collection journal article supplement (https://karger.figshare.com/ndownloader/files/17796509)
Supplement: Supplementary file 1 [file 17796509]

**Suppl. fig. S1.** Western blot analysis of the hemocyte antigens. Hemocyte lysates were isolated from larvae 72 h after the *L. victoriae* wasp infection, run in a 5-15% gradient SDS-PAGE, blotted and developed with the respective antibodies. The 5C3 antibody reacts with three protein bands of 450 kDa, 170 kDa and 40 kDa, the 4G7 antibody reacts with a 37 kDa and the 12F6 antibody reacts with a 75 kDa protein. Arrow indicates the signal given by the crystal cell specific antibody.

**Suppl. fig. S2.** Size analysis of randomly selected 4G7 positive giant hemocytes (including small, 4G7 positive anucleated fractions), 5C3 positive plasmatocytes and 12F6 positive crystal cells (a) and proportion of the mono-, bi- and multinucleated giant hemocytes (b) isolated from naïve and wasp infected larvae. The relative area of the hemocytes was determined using the ImageJ program (<http://imagej.nih.gov/ij/>).

**Suppl. fig. S3.** Transcriptional activity of larval circulating hemocytes of wasp infected larvae. Hemocytes were isolated from the hemolymph and stained for the 4G7 giant cell marker (red) and for the active form of RNA Polymerase II (green). The cell nuclei are visualized with DAPI (blue). Transcriptionally active nuclei of MGHs (arrows) and plasmatocytes (arrowheads) are indicated. Staining was analyzed with a Leica TCS SP5 confocal microscope. The scale bar represents 20 µm.

**Suppl. fig. S4.** Expression of the 4G7 antigen in the sessile tissue of third instar naïve and infected larvae. Carcasses were reacted with the 4G7 antibody, anti-mouse Alexa Fluor 488 and DAPI. Staining was analyzed with an Olympus FV1000 confocal LSM microscope. Scale bars represent 50 µm.

**Suppl. fig. S5.** Cross section of a filamentous projection of a giant cell (middle) and a plasmatocyte (bottom right). A nucleus (n) is in the center of the projection with a thin cytoplasmic rim around it. A loose network of cytoplasm emerges from the perinuclear cytoplasm (white arrows) resulting in a sponge-like overall appearance. The canal system of the spongy area with numerous pores is in connection with the extracellular space (black arrows). In contrast, the cytoplasm of the usual plasmatocyte (lower right corner) has a rim of cytoplasm, lacking the canal system.
